# Supplementary material for: Rethomics: An R framework to analyse high-throughput behavioural data
Source: PubMed Central journal article supplement (PMC6334930; doi:10.1371/journal.pone.0209331), 2019-01-16
Supplement: pone.0209331.s001.pdf [file pone.0209331.s001.pdf]

| Package                                          | Role                                                                                | Main functions                                             |
|--------------------------------------------------|-------------------------------------------------------------------------------------|------------------------------------------------------------|
| behr                                             | utilities                                                                           | behr(), meta(), setbehr(), setmeta()                       |
|                                                  | metadata operations <b>see S1 Fig.</b>                                              | xmd(), rejoin()                                            |
|                                                  | merge and check several tables                                                      | bind.behr_list(), stitch_on()                              |
| ggetho                                           | interface to ggplot ( <b>see main text</b> )                                        | ggetho()                                                   |
|                                                  | tile and “bar tile” plots ( <i>e.g.</i> <b>Fig. 3 and 4A</b> )                      | stat_tile_etho, stat_bar_tile_etho()                       |
|                                                  | population trends as lines and error bars                                           | stat_pop_etho()                                            |
|                                                  | circadian biology utilities ( <i>e.g.</i> <b>Fig. 4 and 5A</b> )                    | stat_ld_annotations(), geom_peak()                         |
|                                                  | visualise spectrograms ( <i>e.g.</i> <b>CWT, Fig. 6</b> )                           | ggspectro()                                                |
| smart time scales (auto-adjust labels and ticks) | scale_x_days(), scale_x_hours(), ...                                                |                                                            |
| damr                                             | “link” metadata to DAM files ( <b>see main text</b> )                               | link_dam_metadata()                                        |
|                                                  | “load” relevant DAM (2 or 5) data as behr.<br>Detects daylight-saving bugs and such | load_dam()                                                 |
| scopr                                            | “link” metadata to ethoscope files                                                  | link_ethoscope_metadata()                                  |
|                                                  | “load” relevant ethoscope data as behr                                              | load_ethoscope()                                           |
|                                                  | utilities (list files, fetch remote data, )                                         | experiment_info(), list_result_files(), ...                |
| zeitgebr                                         | compute periodograms (CWT, AC, $\chi^2$ , LS, Fourier)                              | *_periodogram() (* $\in$ {cwt, ac, chi_sqr, ls, fourrier}) |
|                                                  | preprocess and standardise methods                                                  | periodogram()                                              |
|                                                  | find peak periods in periodograms ( <i>e.g.</i> <b>Fig. 4 and 5A</b> )              | find_peaks()                                               |
|                                                  | compute CWT spectrograms                                                            | spectrogram()                                              |
| sleepr                                           | motion thresholding/velocity detection                                              | motion_detectors()                                         |
|                                                  | sleep definition using N-minute rule                                                | sleep_annotation()                                         |
|                                                  | data curation: dead animals scored as asleep                                        | curate_dead_animals()                                      |
|                                                  | discrete behavioural state architecture                                             | bout_analysis()                                            |
